# Supplementary material
Source: JCI journal article supplement (doi:10.1172/jci121541)
Supplement: sd1 [file 1]

**Figure S1: HuR is activated in a mouse model of cardiac hypertrophy**

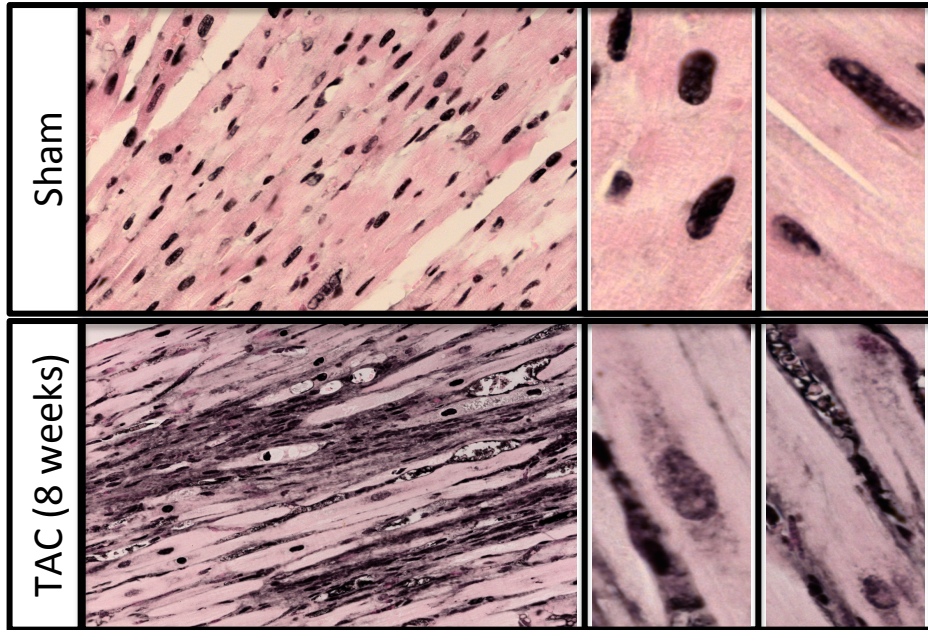

**Figure S1: HuR is activated in a mouse model of cardiac hypertrophy.** DAB stain of HuR (brown) on hearts isolated from c57bl/6 wild type mice 8 weeks post-TAC.

**Figure S2: Creation of a cardiac-specific HuR-deletion mouse.**

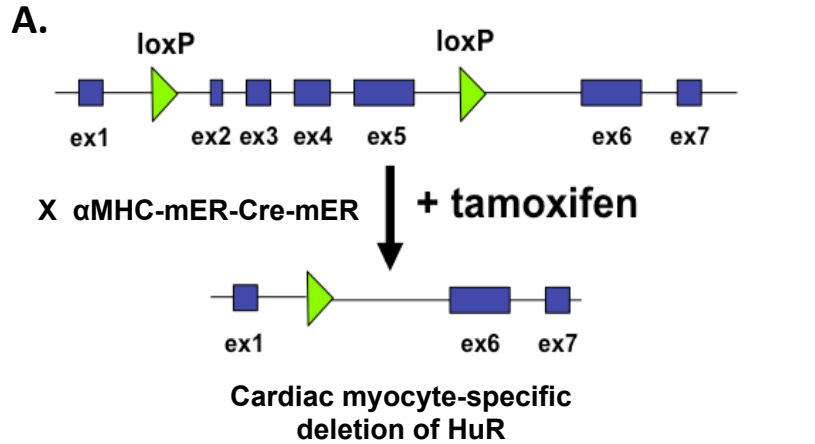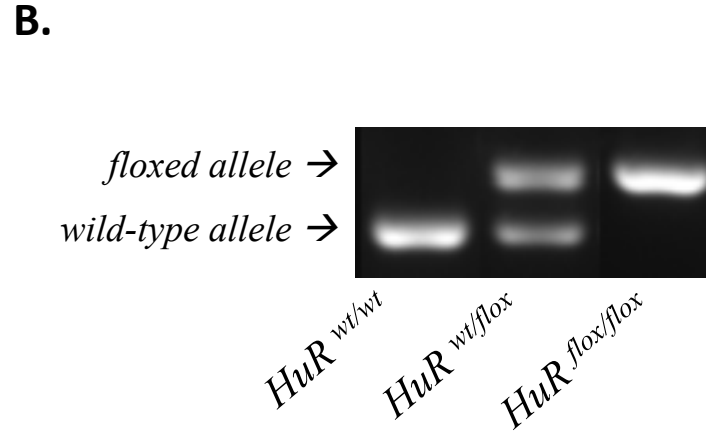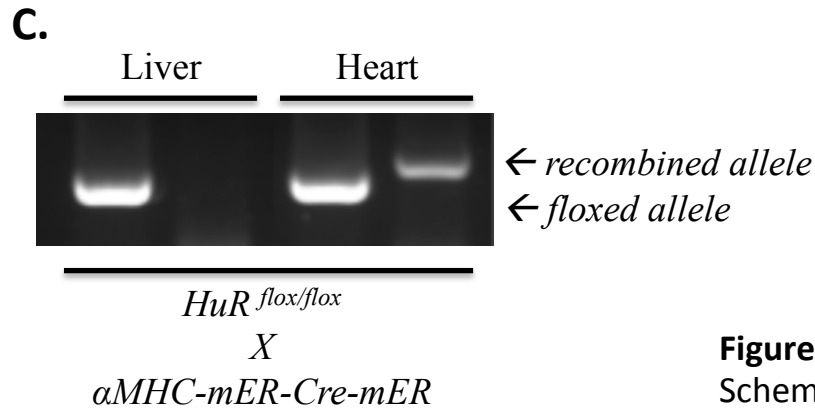

**Figure S2: Creation of a cardiac-specific HuR-deletion mouse. (A)** Schematic of the genetic deletion of HuR using the lox-Cre system and tamoxifen injections to delete exons 2-5 of the HuR gene. **(B)** Genotyping to show the iCM  $HuR^{-/-}$  mice are homozygous for the HuR knockout. **(C)** Genotyping to show the use of the  $\alpha$ MHC-mER-Cre-mER is a cardiac specific knockout of HuR.

**Figure S3: Basal cardiac function is not affected by cardiac-specific HuR deletion.**

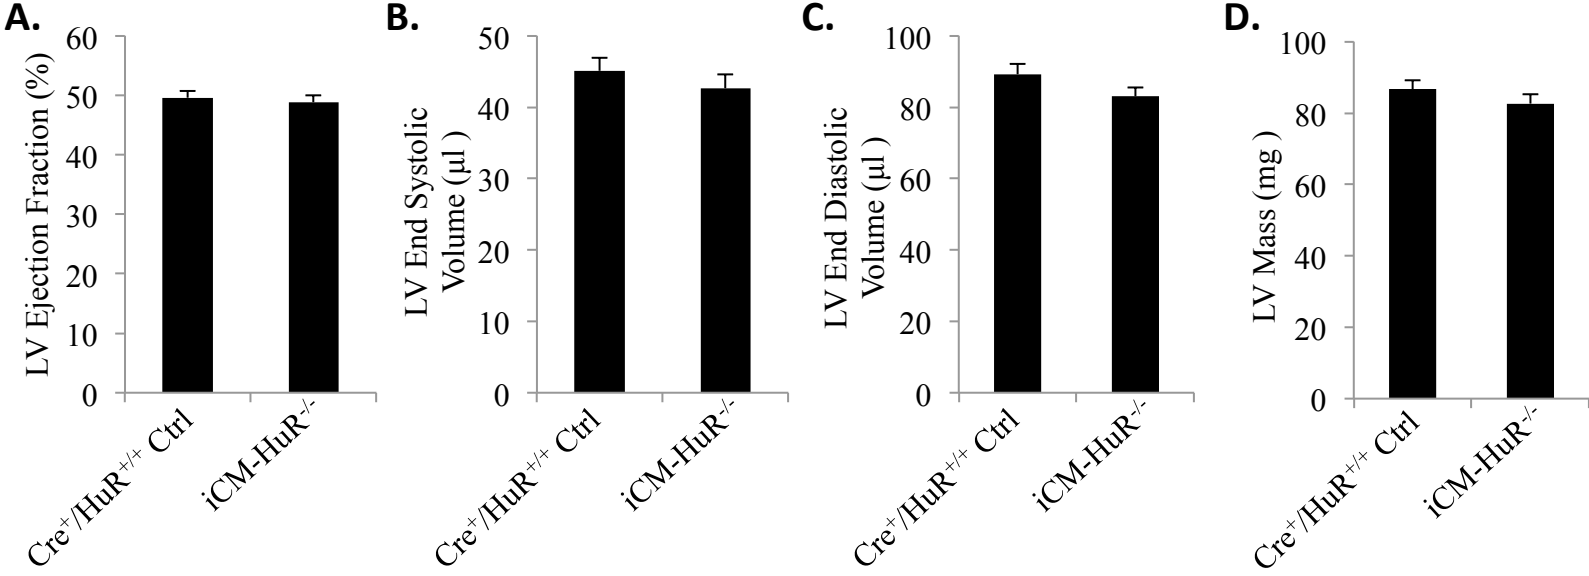

**Figure S3: Basal cardiac function is not affected by cardiac-specific HuR deletion.** (A) LV Ejection Fraction, (B) LV End systolic volume, (C) LV End diastolic Volume, and (D) LV mass, as determined by a baseline echocardiogram, of control and *iCM-HuR<sup>-/-</sup>* mice after tamoxifen treatment, pre-TAC or sham surgery. Data are shown as means ± SEM.

**Figure S4: All mice had equal pressure gradients following TAC.**

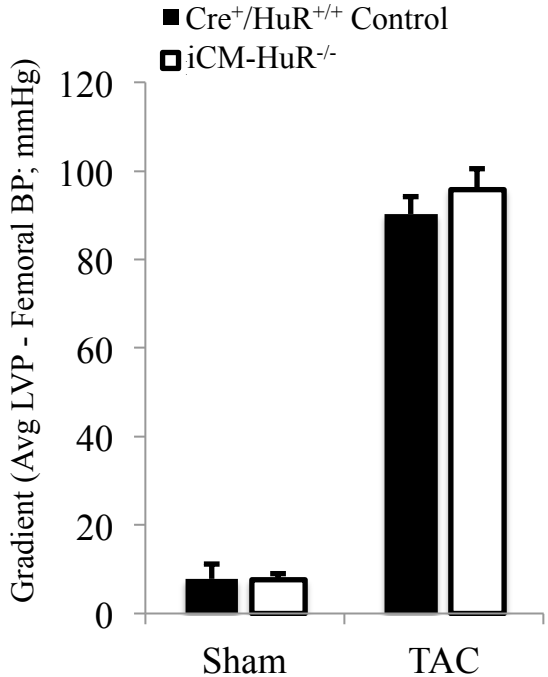

**Figure S4: All mice had equal pressure gradients following TAC.** The pressure gradient (determined by subtracting the femoral blood pressure from the left ventricular pressure) in control and iCM-HuR<sup>-/-</sup> mice 11 weeks post-TAC or sham surgery. Data are shown as means ± SEM.

**Figure S5: Groups were functionally similar at randomization prior to KH-3 treatments**

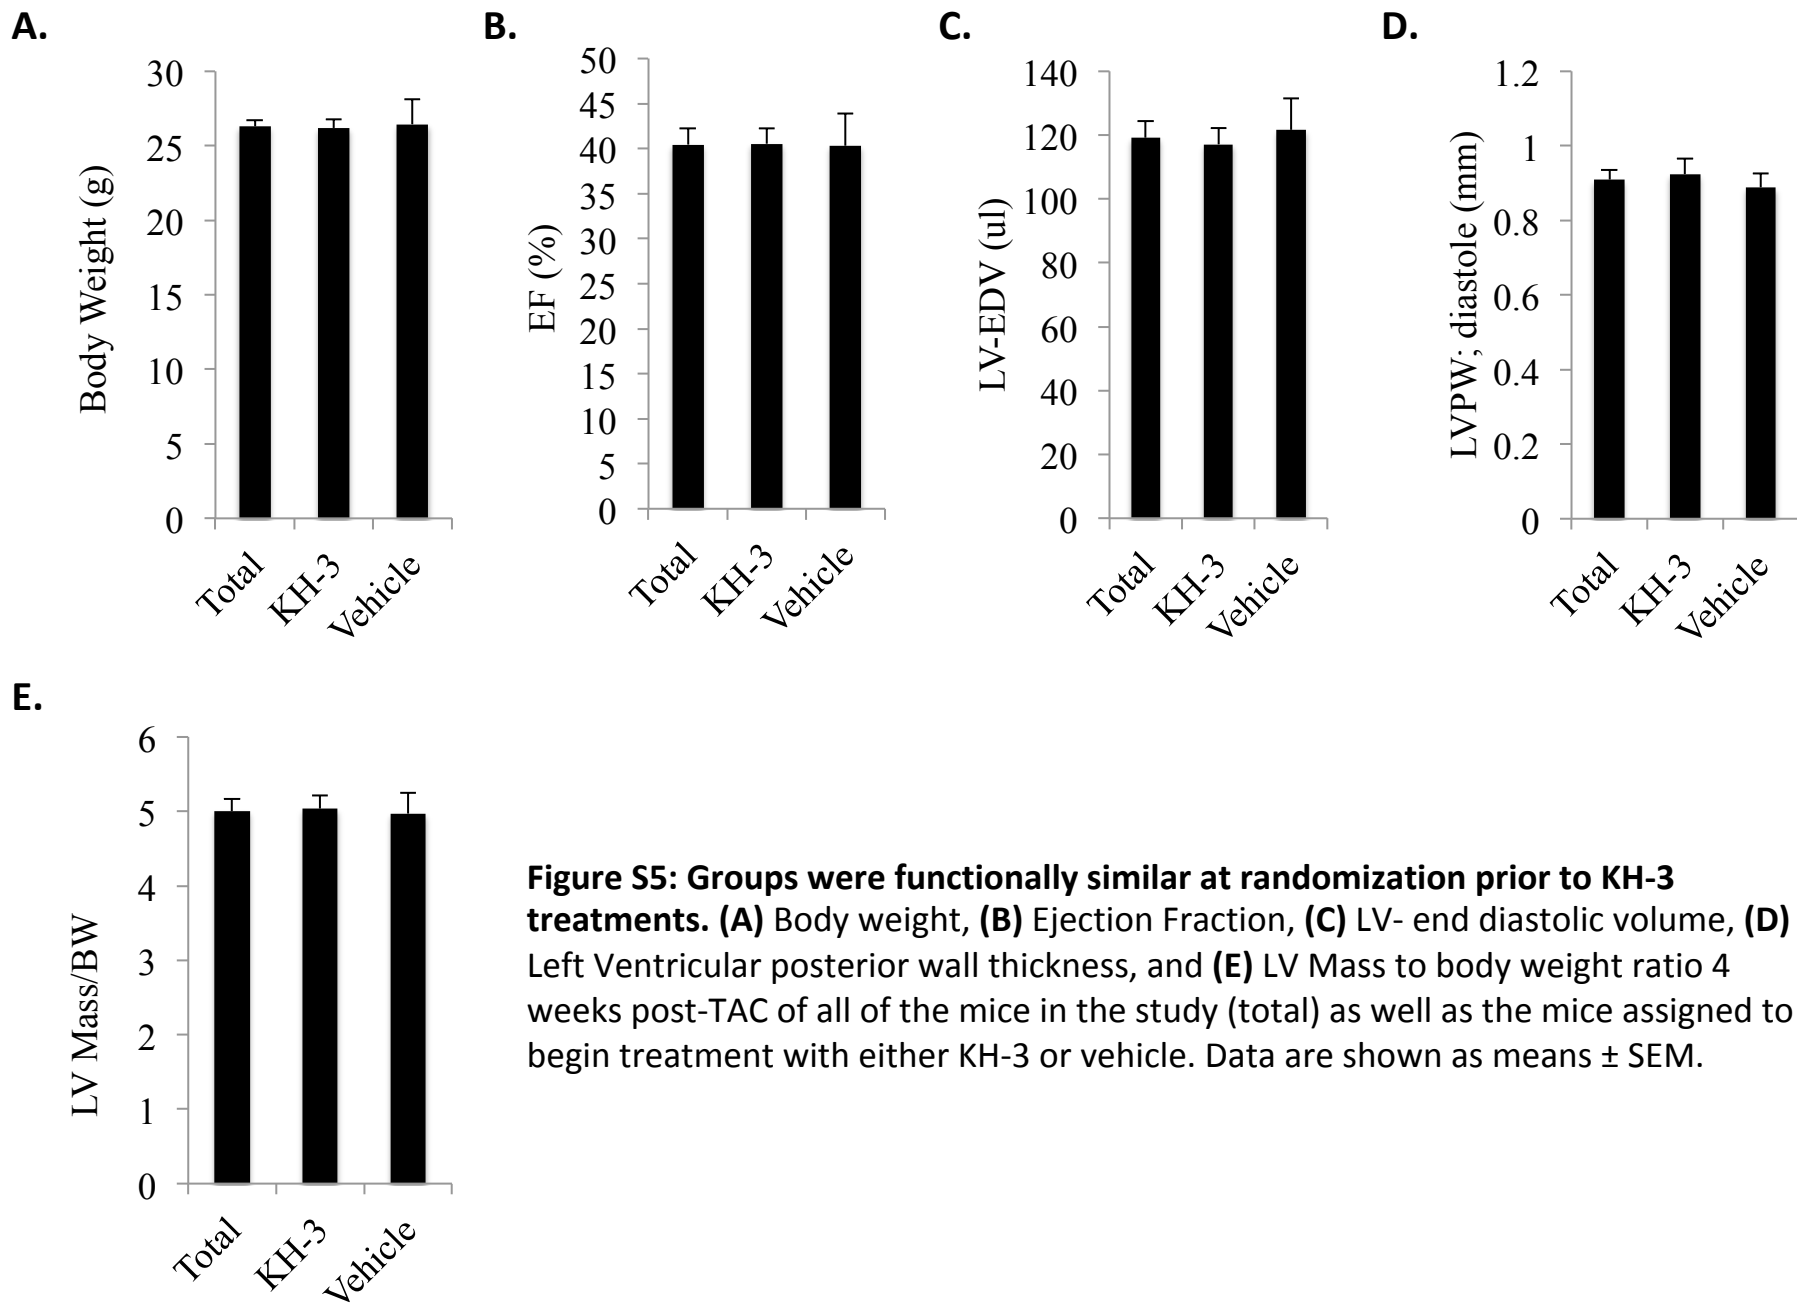

**Figure S6: KH-3 and Vehicle Treated mice had similar LV Pressure Gradients**

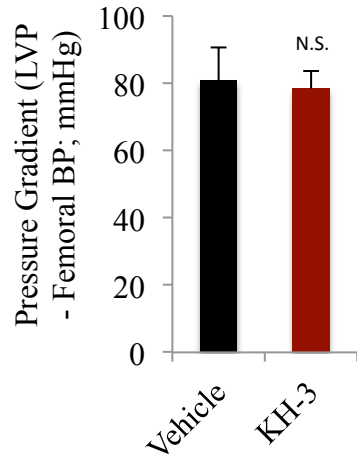

**Figure S6: KH-3 and Vehicle Treated mice had similar LV Pressure Gradients.** Pressure gradient (determined by subtracting the femoral blood pressure from the left ventricular pressure) of mice in the KH-3 treated group and vehicle treated group 11 weeks post-TAC surgery. Data are shown as means  $\pm$  SEM.

**Figure S7: KH-3 treatment shows no effect on vascular function**

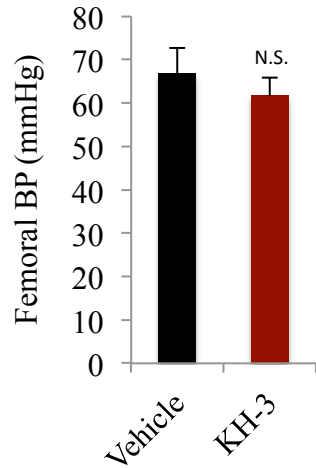

**Figure S7: KH-3 treatment shows no effect on vascular function.** The femoral blood pressure in the KH-3 treated group and the vehicle treated group 11 weeks post-TAC surgery. Data are shown as means  $\pm$  SEM.

**Figure S8: KH-3 treatment does not alter HuR activation or expression.**

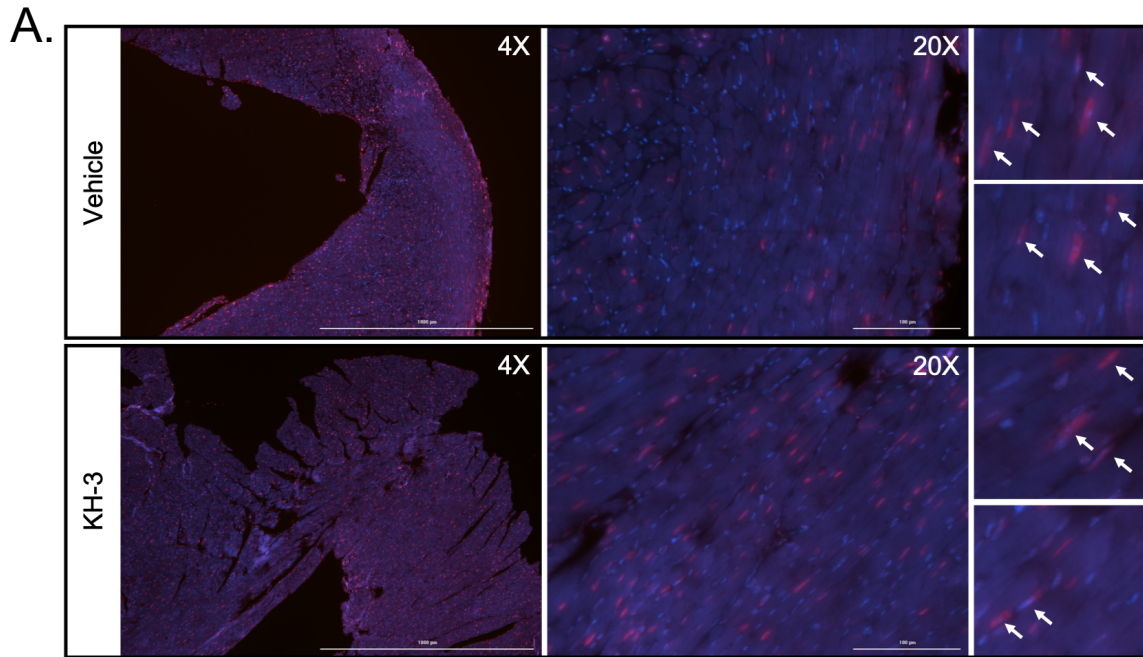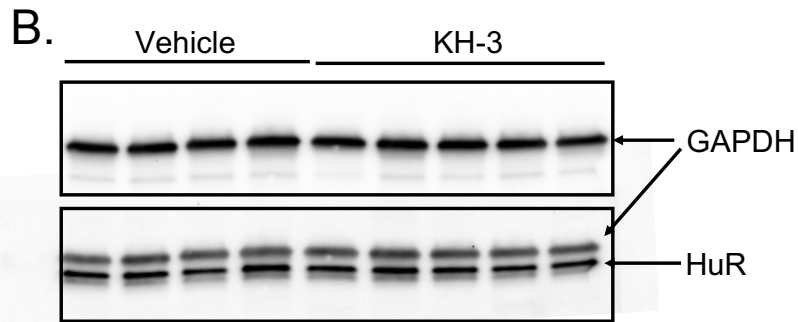

**Figure S8: KH-3 treatment does not alter HuR activation or expression.** HuR activation 11 weeks post TAC was observed in both the vehicle treated mice and the KH-3 treated mice, as seen by IHC images of HuR (pink) translocation from the nucleus (blue), indicated by the white arrows. 4X scale bar: 1000 $\mu$ m, 20X scale bar: 100 $\mu$ m (**A**). HuR expression was also not affected, as shown by western blot. GAPDH serves as a loading control (**B**).

**Table S1. List of transcripts with differential expression in control and iCM-HuR<sup>-/-</sup> mice at baseline (sham vs. sham groups).**

| Gene Symbol | Fold change Control Sham vs. iCM-HuR <sup>-/-</sup> sham | Fold change Control TAC vs. Control sham | Fold change iCM-HuR <sup>-/-</sup> TAC vs. Control TAC | EDGE test: Control Sham vs. iCM-HuR <sup>-/-</sup> sham - FDR p-value correction | EDGE test: Control TAC vs. Control sham - FDR p-value correction | EDGE test: iCM-HuR <sup>-/-</sup> TAC vs. Control TAC - FDR p-value correction |
|-------------|----------------------------------------------------------|------------------------------------------|--------------------------------------------------------|----------------------------------------------------------------------------------|------------------------------------------------------------------|--------------------------------------------------------------------------------|
| Gm2004      | 6.614081665                                              | 0.143812725                              | 7.500592491                                            | 2.39441E-11                                                                      | 7.4527E-21                                                       | 8.32112E-07                                                                    |
| Erdr1       | 2.26930477                                               | 1.260510604                              | 0.814820813                                            | 3.66737E-09                                                                      | 1                                                                | 1                                                                              |
| Myh7        | 1.951617245                                              | 7.642820538                              | 0.604527738                                            | 5.80995E-05                                                                      | 1.80051E-30                                                      | 1                                                                              |
| Gm6563      | 16.6366068                                               | 1.258468812                              | 0.311801266                                            | 0.000192565                                                                      | 1                                                                | 1                                                                              |

**Table S4. List of TAC-dependent transcripts associated with TGF-β signaling**

| Gene Symbol | Fold change Control Sham vs. iCM-HuR-/- sham | Fold change Control TAC vs. Control sham | Fold change iCM-HuR-/- TAC vs. Control TAC | EDGE test: Control Sham vs. iCM-HuR-/- sham - FDR p-value correction | EDGE test: Control TAC vs. Control sham - FDR p-value correction | EDGE test: iCM-HuR-/- TAC vs. Control TAC - FDR p-value correction | Proportion recovery in iCM-HuR-/- |
|-------------|----------------------------------------------|------------------------------------------|--------------------------------------------|----------------------------------------------------------------------|------------------------------------------------------------------|--------------------------------------------------------------------|-----------------------------------|
| Wnt2        | 2.512397092                                  | 3.576714394                              | 0.418059389                                | 1                                                                    | 0.000567535                                                      | 0.126757062                                                        | 0.8077866                         |
| Sfrp1       | 0.957582485                                  | 2.130545831                              | 0.631505055                                | 1                                                                    | 1.13897E-08                                                      | 0.002123649                                                        | 0.694439224                       |
| Cx3cr1      | 1.215485065                                  | 4.120171764                              | 0.537162952                                | 1                                                                    | 3.44339E-25                                                      | 0.124988228                                                        | 0.61117409                        |
| Postn       | 1.038619123                                  | 11.02058296                              | 0.454874387                                | 1                                                                    | 1.4745E-104                                                      | 0.000463449                                                        | 0.599526201                       |
| Wnt5a       | 1.044970712                                  | 0.858478909                              | 1.096346918                                | 1                                                                    | 0.00700897                                                       | 1                                                                  | 0.584448552                       |
| Nox4        | 0.811463742                                  | 2.751560787                              | 0.665368852                                | 1                                                                    | 4.33976E-08                                                      | 0.898534215                                                        | 0.525678556                       |
| Runx1       | 0.992008327                                  | 2.150464655                              | 0.721635952                                | 1                                                                    | 0.000211493                                                      | 1                                                                  | 0.520321978                       |
| Ankrd1      | 0.683197624                                  | 4.61846843                               | 0.594886149                                | 1                                                                    | 8.9519E-31                                                       | 0.230078079                                                        | 0.517071123                       |
| Ppargc1a    | 1.024019504                                  | 0.686965411                              | 1.233462973                                | 1                                                                    | 8.25062E-08                                                      | 0.571945689                                                        | 0.512342702                       |
| Dbn1        | 1.064109719                                  | 2.778381031                              | 0.720734881                                | 1                                                                    | 3.44551E-15                                                      | 0.425168052                                                        | 0.436298462                       |
| Col1a1      | 1.05390113                                   | 3.074522377                              | 0.708000403                                | 1                                                                    | 1.05238E-31                                                      | 0.254161195                                                        | 0.432754694                       |
| Col4a2      | 1.052540506                                  | 2.440936445                              | 0.763232849                                | 1                                                                    | 5.22721E-23                                                      | 0.44258734                                                         | 0.401081929                       |
| Tgfb1       | 1.111777604                                  | 1.777558079                              | 0.841935418                                | 1                                                                    | 3.33827E-05                                                      | 1                                                                  | 0.361347894                       |
| Scx         | 1.008578331                                  | 2.394636735                              | 0.800610274                                | 1                                                                    | 7.41887E-10                                                      | 1                                                                  | 0.342358659                       |
| Sox6        | 0.98376547                                   | 0.790460208                              | 1.088101093                                | 1                                                                    | 0.000149998                                                      | 1                                                                  | 0.332349326                       |
| Pde3a       | 0.979841158                                  | 0.834402594                              | 1.063322226                                | 1                                                                    | 0.000165065                                                      | 1                                                                  | 0.319064354                       |
| Clec3b      | 0.992447759                                  | 0.533196549                              | 1.253506362                                | 1                                                                    | 1.57494E-08                                                      | 0.956298346                                                        | 0.289562378                       |
| Penk        | 1.077521446                                  | 0.393160678                              |                                            | 1                                                                    | 0.000102721                                                      | 1                                                                  | 0.196035399                       |
| Serpine1    | 0.967053287                                  | 2.904976651                              | 0.873805893                                | 1                                                                    | 9.77661E-09                                                      | 1                                                                  | 0.192438545                       |
| Star        | 0.975232788                                  | 4.338111431                              | 1.047469829                                | 1                                                                    | 5.82943E-20                                                      | 1                                                                  | -0.061690394                      |

**Table S6. Genes changed between wild-type and iCM-HuR<sup>-/-</sup> mice post-TAC that were not changed between wild-type sham v. TAC.**

| Gene Symbol   | Fold change Control Sham vs. iCM-HuR <sup>-/-</sup> sham | Fold change Control TAC vs. Control sham | Fold change iCM-HuR <sup>-/-</sup> TAC vs. Control TAC | EDGE test: Control Sham vs. iCM-HuR <sup>-/-</sup> sham - FDR p-value correction | EDGE test: Control TAC vs. Control sham - FDR p-value correction | EDGE test: iCM-HuR <sup>-/-</sup> TAC vs. Control TAC - FDR p-value correction |
|---------------|----------------------------------------------------------|------------------------------------------|--------------------------------------------------------|----------------------------------------------------------------------------------|------------------------------------------------------------------|--------------------------------------------------------------------------------|
| Gm26508       | 1.12585456                                               | 0.708899021                              | 5.105226079                                            | 1                                                                                | 1                                                                | 2.13544E-05                                                                    |
| 1810014B01Rik | 0.666041988                                              | 1.017804266                              | 1.508020325                                            | 0.27706062                                                                       | 0.870051505                                                      | 0.007000991                                                                    |
| Gm4070        | 0.932590917                                              | 0.972219266                              | 1.444875281                                            | 1                                                                                | 0.736706296                                                      | 0.004995474                                                                    |
| Gm11716       | 1.380071303                                              | 1.371832634                              | 0.571916506                                            | 1                                                                                | 0.533021528                                                      | 0.002123649                                                                    |
| Gm28372       | 0.9419528                                                | 0.348142859                              | 6.356475918                                            | 1                                                                                | 0.357631079                                                      | 0.009414619                                                                    |
| Gm13304       | 1.015651987                                              | 1.673026159                              | 0.591111171                                            | 1                                                                                | 0.02941837                                                       | 0.002878905                                                                    |
